# Supplementary material for: Spatially heterogeneous effect of climate warming on the Arctic land ice
Source: Copernicus journal article supplement (doi:10.5194/tc-17-4645-2023), 2023-11-06
Supplement: Supplementary file 1 [file tc-17-4645-2023-supplement.pdf]

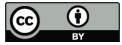

*Supplement of*

## **Spatially heterogeneous effect of climate warming on the Arctic land ice**

**Damien Maure et al.**

*Correspondence to:* Damien Maure ([damien.maure@uliege.be](mailto:damien.maure@uliege.be))

The copyright of individual parts of the supplement might differ from the article licence.

| Station    | Station altitude [m asl] | MAR altitude [m asl] | Summer bias [°C] | Altitude corrected summer bias [°C] |
|------------|--------------------------|----------------------|------------------|-------------------------------------|
| Hopen      | 6                        | 11                   | -0.63            | -0.58                               |
| Sveagruva  | 9                        | 244                  | -4.62            | -2.27                               |
| Lufthavn   | 2                        | 298                  | -5.06            | -2.1                                |
| Ny-ålesund | 8                        | 180                  | -2.53            | -0.81                               |

**Table S1.** Temperature bias correction example from altitude difference between MAR pixel and AWSs using a fixed 1°C/100m gradient.

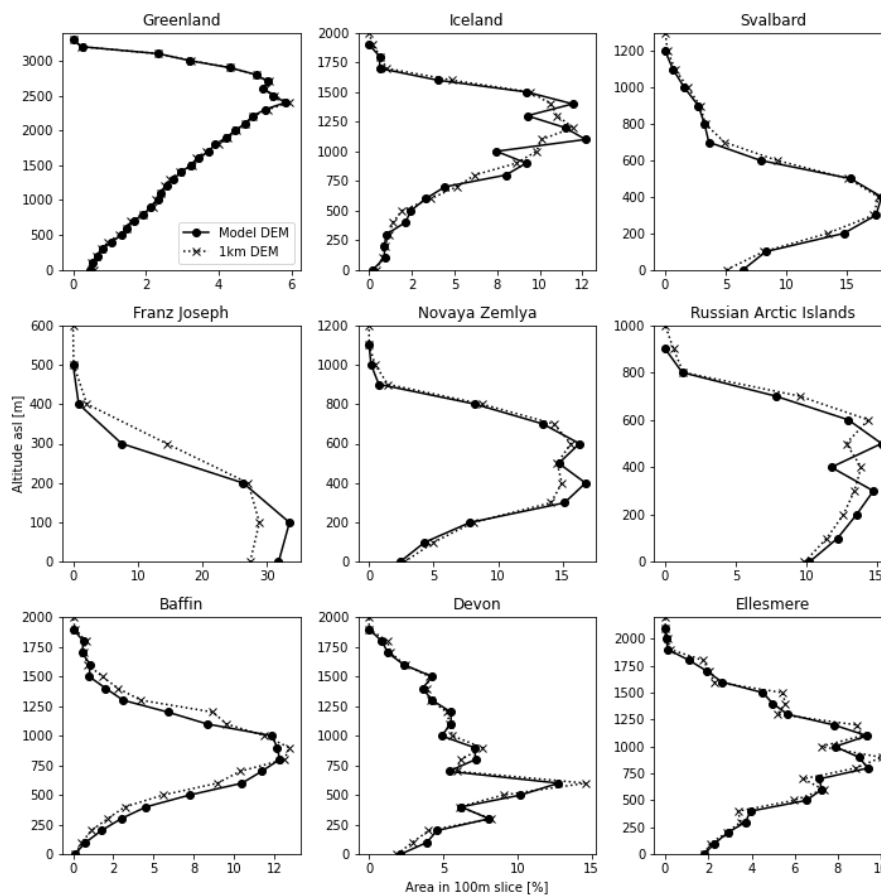

**Figure 1.** Comparison of the hypsometry of the land ice from the model grids (6 km resolution, in dots, solid line) and of a 1km grid in the same georeferencing system (x marks, dotted line). Both DEMs come from ETOPO01.

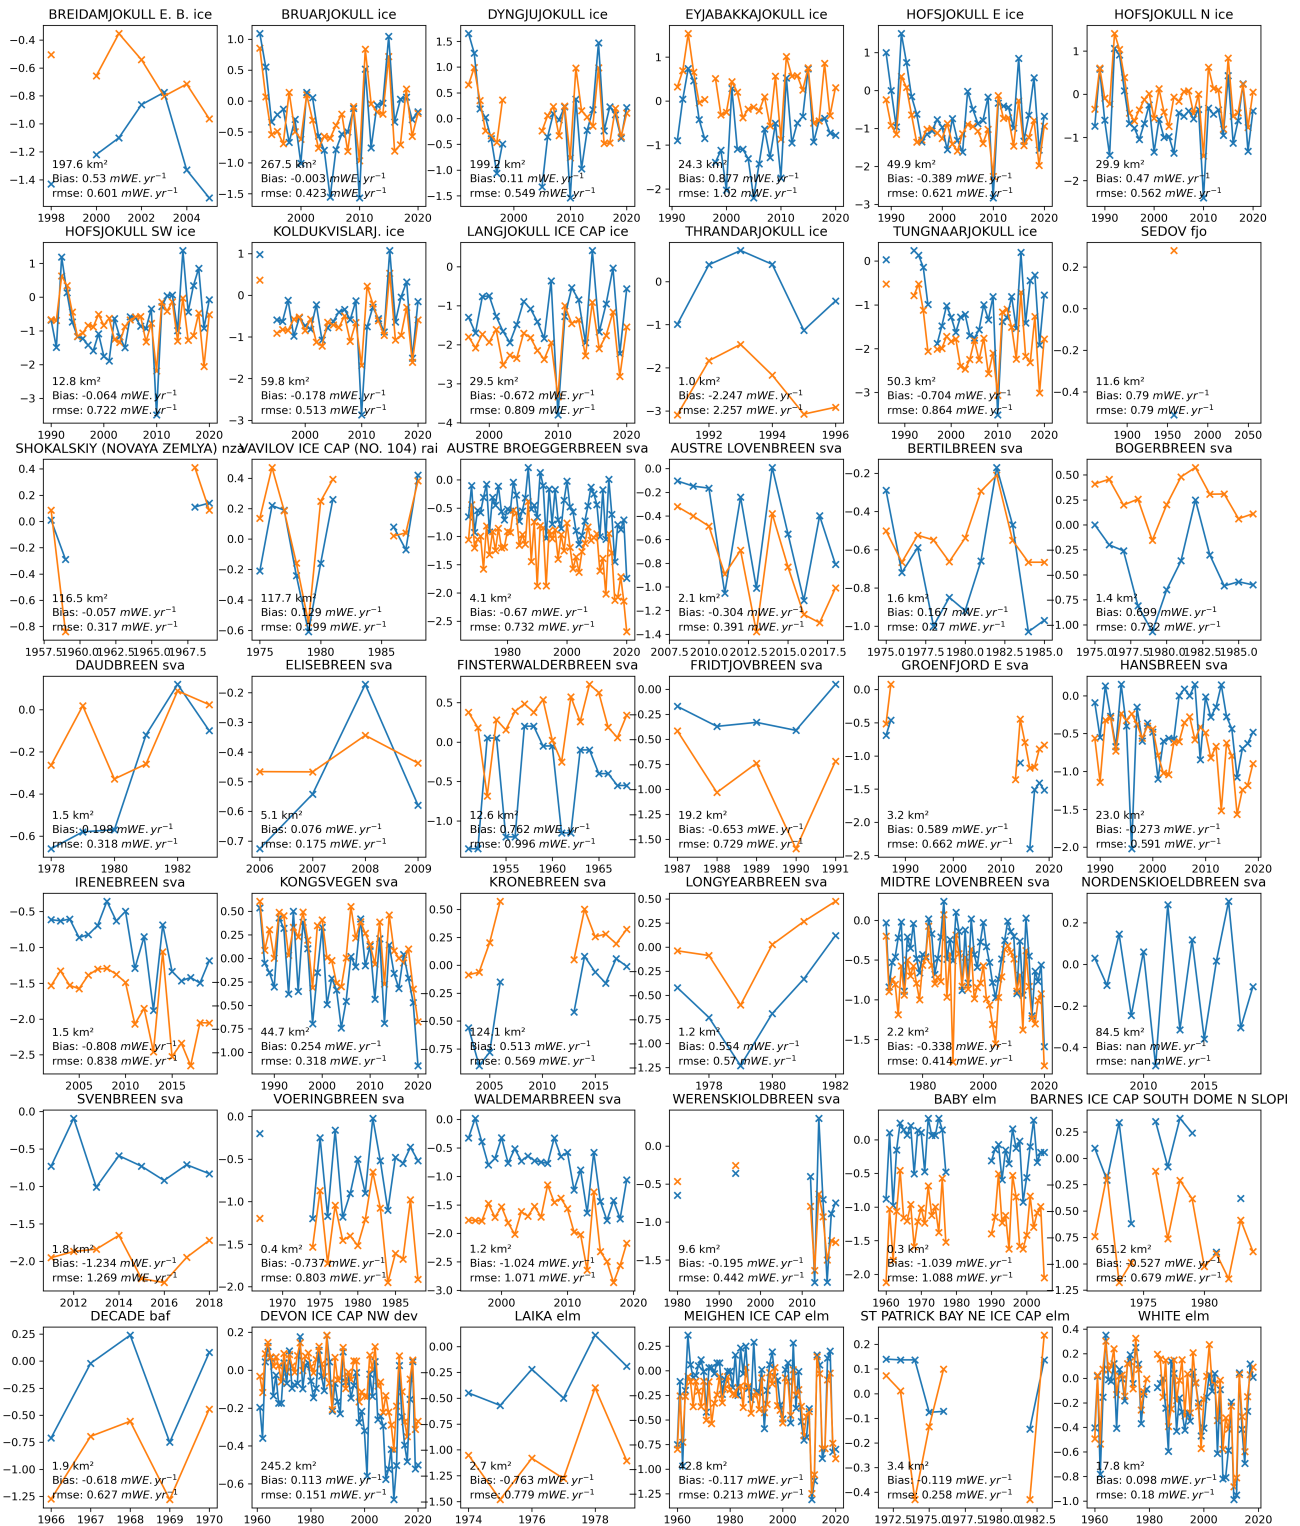

**Figure 2.** Modelled and observed annual specific mass balance evolution for every relevant glacier of the WGMS dataset. The name of the glacier and its sub region is indicated in the title of each subplot. **2**

| Variable  | Sub Domain | Mean Observed | Bias  | CRMSE | r    |
|-----------|------------|---------------|-------|-------|------|
| P2m [hPa] | Greenland  | 1006.96       | 3.35  | 1.60  | 0.99 |
|           | Russia     | 1013.75       | -4.35 | 2.15  | 0.98 |
|           | Svalbard   | 1008.87       | 0.51  | 2.45  | 0.98 |
|           | Iceland    | 1006.46       | -5.13 | 0.95  | 1.00 |
|           | Canada     | 1005.68       | -4.74 | 2.75  | 0.96 |
| T2m [°C]  | Greenland  | -7.49         | -1.24 | 3.07  | 0.95 |
|           | Russia     | -10.74        | -1.72 | 3.33  | 0.96 |
|           | Svalbard   | -4.58         | -2.48 | 3.59  | 0.92 |
|           | Iceland    | 4.13          | -0.33 | 1.68  | 0.96 |
|           | Canada     | -13.49        | 0.14  | 3.33  | 0.98 |

**Table S2.** Evaluation results for the pre-International Geophysical Year period (1950 - 1956)

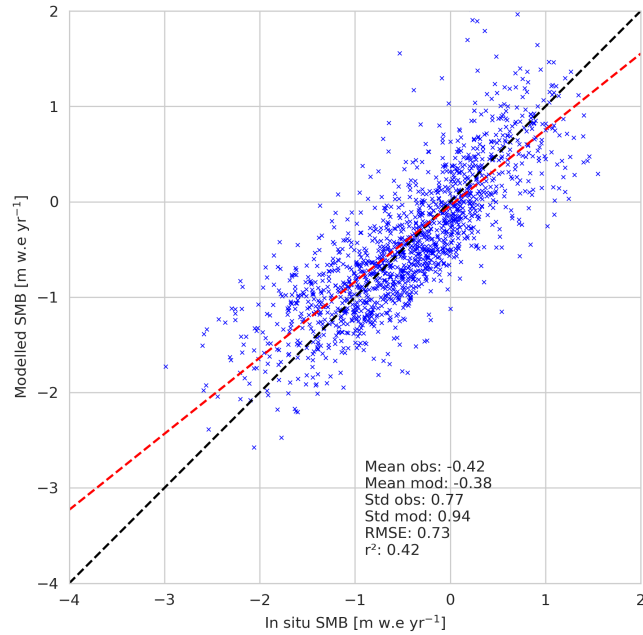

**Figure 3.** Modelled versus observed SMB annual values using stake data from Noël et al. (2020). The modelled SMB was downscaled using a local SMB altitude gradient with the methodology described in Franco et al. (2012). The observed stake-averaged interannual-variability is  $0.34 \text{ mW Eyr}^{-1}$ , the modelled one is  $0.25 \text{ mW Eyr}^{-1}$ , and the average SMB correlation on a given stake is 0.69.

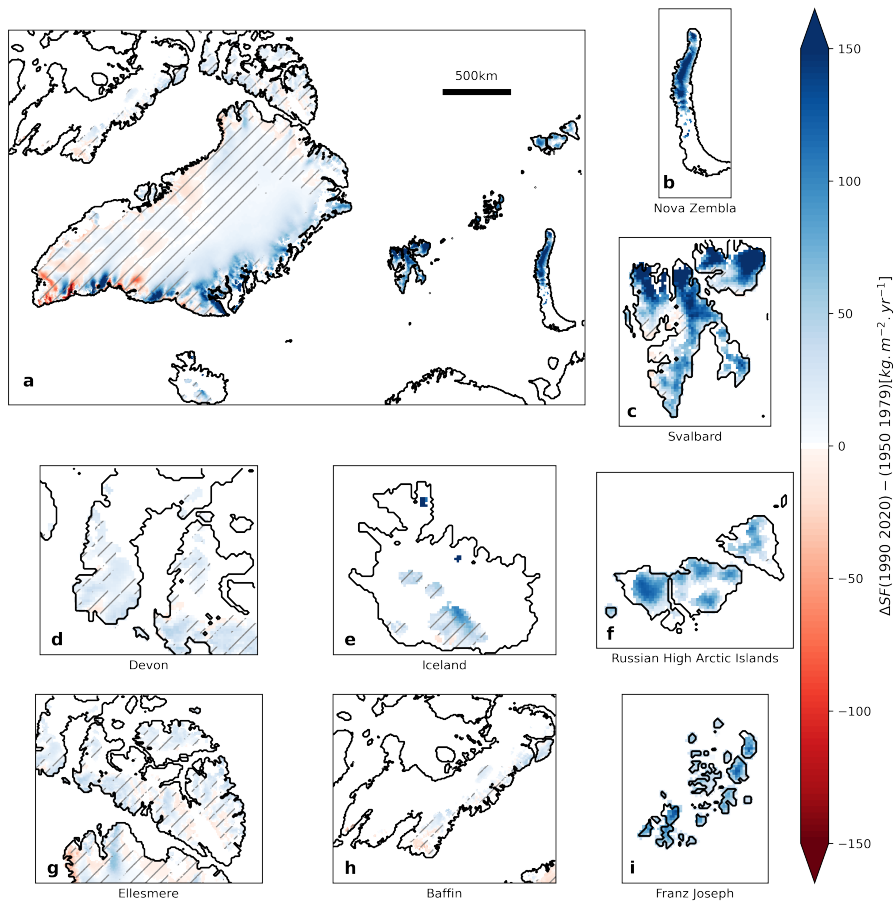

**Figure 4.** Annual SF anomalies between the (1990-2020) and (1950-1979) periods over (a) the whole Arctic, (b) Nova Zembla, (c) Svalbard, (d) Devon, (e) Iceland, (f) Russian High Arctic Islands, (g) Ellesmere, (h) Baffin and (i) Franz Joseph land. Hashed areas denote where the anomaly has a low significance value regarding its variance (using Student's t-test with 90% p-value)
